# 1 **Heartbeats entrain breathing via baroreceptor-mediated modulation** 2 **of expiratory activity**

3  
4 William H. Barnett<sup>1</sup>, David M. Baekey<sup>2</sup>, Julian F. R. Paton<sup>3</sup>, Thomas E. Dick<sup>4&5,#</sup>, Erica A.  
5 Wehrwein<sup>6,#</sup>, Yaroslav I. Molkov<sup>1&7,#</sup>

6  
7 <sup>1</sup> Department of Mathematics and Statistics, Georgia State University, Atlanta, GA

8 <sup>2</sup> Department of Pharmacology and Therapeutics, University of Florida, Gainesville, FL

9 <sup>3</sup> Manaaki Mānawa – The Centre for Heart Research, Department of Physiology, Faculty of  
10 Medical and Health Sciences, University of Auckland, Auckland, New Zealand

11 <sup>4</sup> Division of Pulmonary, Critical Care and Sleep Medicine, Department of Medicine, Case  
12 Western Reserve University, Cleveland, OH

13 <sup>5</sup> Department of Neurosciences, Case Western Reserve University, Cleveland, OH

14 <sup>6</sup> Department of Physiology, Michigan State University, East Lansing, MI

15 <sup>7</sup> Neuroscience Institute, Georgia State University, Atlanta, GA

16  
17 #shared senior authorship

18  
19  
20 Running Head: Cardio-Ventilatory Coupling

## 21 **Corresponding Authors**

22  
23

Yaroslav I. Molkov, PhD

Department of Mathematics and Statistics

Georgia State University

25 Park Place, Rm 1415

Atlanta, GA 30303

Email: [ymolkov@gsu.edu](mailto:ymolkov@gsu.edu)

Phone: (404) 413-6422

Erica A. Wehrwein, Ph.D.

Department of Physiology

Michigan State University

567 Wilson Rd, Rm 2201J

East Lansing, MI 48824

Email: [wehrwei7@msu.edu](mailto:wehrwei7@msu.edu)

Phone: (517) 884-5043

24

## 25 **Abstract**

26  
27 Cardio-ventilatory coupling refers to a heartbeat (HB) occurring at a preferred latency before the  
28 onset of the next breath. We hypothesized that the pressure pulse generated by a HB activates  
29 baroreceptors that modulates brainstem expiratory neuronal activity and delays the initiation of  
30 inspiration. In supine male subjects, we recorded ventilation, electrocardiogram, and blood  
31 pressure during 20-min epochs of baseline, slow-deep breathing, and recovery. In *in situ* rodent  
32 preparations, we recorded brainstem activity in response to pulses of perfusion pressure. We  
33 applied a well-established respiratory network model to interpret these data. In humans, the  
34 latency between HBs and onset of inspiration was consistent across different breathing patterns.  
35 In *in situ* preparations, a transient pressure pulse during expiration activated a subpopulation of  
36 expiratory neurons normally active during post-inspiration; thus, delaying the next inspiration. In  
37 the model, baroreceptor input to post-inspiratory neurons accounted for the effect. These studies  
38 are consistent with baroreflex activation modulating respiration through a pauci-synaptic circuit  
39 from baroreceptors to onset of inspiration.

40

41

## 42 **Introduction**

43

44 Coupling of the respiratory and the cardiovascular systems is anatomical, physiological and  
45 reciprocal. Anatomically and physiologically, the respiratory and cardiac systems may interact for  
46 efficient gas exchange in that it decreases cardiac work (Ben-Tal, 2012; Ben-Tal *et al.*, 2012).  
47 Although cardiorespiratory coupling (CRC) is reciprocal, the effect of respiration (*i.e.*, the slower  
48 rhythm) on the cardiovascular system (*i.e.*, the faster rhythm) is more apparent than the effect of  
49 the cardiovascular system on respiration. Indeed, the modulation of heart rate by respiration was  
50 one of the first physiologic system properties described (early 16<sup>th</sup> century). Although referred as  
51 a respiratory sinus arrhythmia (RSA), it is not an arrhythmia but rather an increase in HR during  
52 inspiration followed by a decrease during expiration (Billman, 2011). Various mechanisms  
53 contribute to RSA. These include mechanical, as negative pleural pressure increases venous  
54 return, and neural, in that pre-ganglionic cardiac vagal neural activity is respiratory modulated  
55 with increased activity during expiration and thus, lowering HR.

56  
57 The reciprocal manifestation of CRC, the cardiovascular system driving changes in the respiratory  
58 system, is cardio-ventilatory coupling (CVC). More specifically, CVC refers to the onset of  
59 inspiration occurring at a preferential latency following the last heartbeat (HB) in expiration  
60 (Tzeng *et al.*, 2003; Friedman *et al.*, 2012). The physiologic purpose of CVC was suggested to  
61 align breathing to the cardiac cycle and, thus, optimize RSA and make gas exchange more energy  
62 efficient (Galletly & Larsen, 1998). The “cardiac-trigger hypothesis” implicates baroreceptor  
63 input as a mechanism involved in the consistency of the latency observed between HB and the  
64 onset of inspiration. Basically, CVC depends on intact baroreceptors, so according to the cardiac-  
65 trigger hypothesis, the pulse pressure initiates an inspiration via baroreceptor activation (Bucher,  
66 1963). However, the central neural substrate mediating this coupling remains undefined (Galletly  
67 & Larsen, 1997; Tzeng *et al.*, 2007).

68  
69 The literature supports the hypothesis that increases in blood pressure facilitate expiratory rather  
70 than inspiratory motor activity and preferentially modulate expiratory compared to inspiratory  
71 brainstem neural activity (Bishop, 1974; Grunstein *et al.*, 1975; Lindsey *et al.*, 1998). Respiratory  
72 rate decreased and the duration of expiration (TE) increased during these sustained increases in  
73 blood pressure (Bishop, 1974; Grunstein *et al.*, 1975). Subsequent studies recorded brainstem  
74 neural activity during baroreceptor activation (Richter & Seller, 1975; Lindsey *et al.*, 1998; Dick  
75 & Morris, 2004; Dick *et al.*, 2005; Baekey *et al.*, 2010). Richter and Seller (1975) recorded  
76 inspiratory (I) and expiratory (E) modulated activity intracellularly from the caudal medulla  
77 during pulsatile increases in arterial blood pressure. They reported that increases in carotid sinus  
78 pressure inhibited I- but failed to alter E- activity even though baroreceptor activation depolarized  
79 E-modulated neurons during periods of spontaneous hyperpolarization (Richter & Seller, 1975).  
80 Twenty-five years later Lindsey and colleagues returned to the question of how baroreceptor  
81 activation affecting respiratory-modulated neurons. They recorded neural activity from 221  
82 respiratory modulated neurons in the ventral respiratory column (Lindsey *et al.*, 1998) during  
83 gradually applied and sustained increases in blood pressure. Consistent with previous work  
84 (Richter & Seller, 1975), I-neurons largely decreased their activity during baroreceptor activation  
85 (aug-I neurons (n=61) 42.6% decreased vs. 8.2% increased; dec-I neurons (n=69) 17.4%  
86 decreased and 8.7% increased). Similar to I neurons, 22.9% of aug-E neurons (n=48) decreased

87 rather than increased (14.6%) their activity during baroreceptor activation. In contrast, 32.6% of  
88 post-I neurons (n=43) increased and only 14% decreased their activity during the sustained baro-  
89 activation. Even though the majority of respiratory-modulated neurons did not change their firing  
90 frequency during the sustained baroactivation, increases in the post-I neural activity was  
91 associated with TE prolongation.

92

93 In a preliminary publication, we examined the effect of transient pressure pulses that inhibited  
94 sympathetic nerve activity and delayed the onset of the next inspiration on TE and on medullary  
95 neural activity *in situ* rodent preparations (Baekey *et al.*, 2010). We reported an instance of two  
96 simultaneously recorded expiratory neurons, one with decremting discharge pattern (post-I) and  
97 the other with augmenting activity (aug-E). When a short arterial pressure pulse was delivered  
98 during expiration, the post-I neuron increased and the aug-E neuron decreased their activities.  
99 These changes in activity were associated with a prolongation of TE. As the pulse subsided the  
100 post-I activity decreased and the aug-E neuron became reactivated. This was anecdotal evidence  
101 that the resetting of the respiratory rhythm was mediated primarily by the activation of the post-I  
102 activity.

103

104 The cardiac-trigger hypothesis implies that baroreceptor activation should initiate inspiration by  
105 activating pre-I activity. In contrast, published data indicates that baroreceptor activation affected  
106 E-modulated activity. Here, we expand our preliminary observations and test the hypothesis that  
107 CVC is mediated by the baroreceptors sensing the arterial pulse pressure and act by modulating  
108 post-I and expiratory neural activity (Baekey *et al.*, 2008; Baekey *et al.*, 2010). We explored this  
109 theoretical mechanism of CVC by using data from conscious humans, *in situ* rodent preparations,  
110 and mathematical modeling. We assessed the relationship between the HB and the onset of  
111 inspiration during normal and slow deep breathing in humans and during transient baroreceptor  
112 activation whilst recording brainstem respiratory neural activity in rodent *in situ* preparations.  
113 Then, from these rodent data, we developed a mathematical model of respiratory-baroreflex  
114 interaction and simulated human data to evaluate the possibility that the CVC may be due to the  
115 recruitment of expiratory neurons involved in determining the duration of expiration and the  
116 inspiratory onset.

117

## 118 **Results**

119

120 *A hallmark of HB distribution is a preferred interval between the last HB during expiration*  
121 *and the onset of inspiration in human subjects (n=10, males).*

122

123 CVC manifests itself as partial synchronization between HBs and respiratory oscillations and  
124 thus, is a property of CRC. However, due to substantial variability of respiratory phase durations  
125 respiratory phase-resetting due to this synchronization can be difficult to detect and characterize.  
126 Consistent with previously used approaches (Tzeng *et al.*, 2003; Friedman *et al.*, 2012), we found  
127 that the timing of the HB occurrence relative to the onset of the closest inspiratory period has the  
128 best defined structure compared to other metrics, e.g. HB phase within the respiratory cycle. Even  
129 though the latter metric appears similar, due to high variability of the respiratory cycle duration,  
130 the same time interval can result in drastically different phase difference.

131

132 In Figure 1, the raster plot has a pronounced structure indicating strong CVC for this individual.  
133 Each blue dot represents a HB; the  $x$ -coordinate is the time when the HB occurred, and the  $y$ -  
134 coordinate is the time interval between the HB and the onset of the closest inspiratory period.  
135 Negative times indicate that the HB occurred before the inspiratory onset, and positive times  
136 correspond to HBs that follow the closest inspiratory onset. Typical duration of the baseline  
137 respiratory cycle is about 5 seconds, so the  $y$  axis range covers approximately  $\pm$  half the cycle  
138 preceding and following each inspiratory onset. Specifically, the HBs immediately before and  
139 after E-to-I phase transition tend to occur at well-defined times (horizontal stripes of blue dots).  
140 The recording includes the three 20-min epochs (indicated by green to red vertical lines marking  
141 the beginning and end of each epoch, respectively): baseline (left), slow deep breathing (SDB,  
142 middle), and recovery (right). Interestingly, it is hard to see any difference in the structure of this  
143 plot between the three breathing epochs. One can notice, however, that the dots become less  
144 dense during SDB in the middle of the plot due to the smaller number of respiratory cycles.

145

146 We characterized this consistent CVC structure by estimating the HB probability distribution  
147 function as a normalized number of HBs occurring at a particular latency relative to the closest  
148 inspiratory onset for each experimental condition and each individual. This distribution is

149 multimodal with each peak corresponding to a horizontal stripe of blue dots in Figure 1.  
150 Generally, the HB closest to 0 latency defined the narrowest horizontal stripe (this peak is shown  
151 in Fig. 2). The distance between peaks reflects the average RR interval of the corresponding  
152 individual. While the primary peak remains invariant, fluctuation in HR broadened secondary  
153 peaks (see Fig. 1). Based on these observations, we theorized that the CVC interaction is strongest  
154 between the HB closest to the inspiratory onset. In all individuals, the primary peak of the  
155 distribution of HR was within half a second before the inspiratory onset. Therefore, we focused  
156 on this window for Figure 2 and for further analysis.

157  
158 ***Cardio-ventilatory coupling does not depend on the breathing pattern in human subjects.***

159  
160 Figure 2 shows the estimated cumulative distribution functions (CDF, blue) as well as histograms  
161 (green) of HB latency before next inspiratory onset for three representative individuals during the  
162 three experimental conditions (all HBs for the ~20 min periods of baseline, SDB, and recovery).  
163 If HBs and respiratory oscillations did not interact, then this latency would be distributed  
164 uniformly (Fig. 2, the orange line represents the uniform distribution). We quantified CVC as the  
165 maximal difference between the CDF and the uniform distribution (the red bars in Fig. 2). To  
166 evaluate statistical significance of these differences, we used the Kolmogorov-Smirnov statistical  
167 test which showed that 9 out of 10 individuals in our cohort had significant CVC (*i.e.*, their  
168 latency distributions were significantly different from uniform at baseline). Furthermore, there  
169 was no significant difference between latency distributions obtained in different experimental  
170 conditions for a particular individual meaning that SDB in a relaxed state did not affect CVC.

171  
172 Given that the difference between the actual and uniform latency distributions were significant,  
173 we used this difference as an index of coupling strength. Interestingly, this measure was  
174 consistent across the cohort (see Fig. 3A) as the standard deviation over the group is relatively  
175 small. Thus, consistent with our observation that the latency distribution does not depend on  
176 experimental condition for a particular individual, the group mean does not change significantly  
177 from baseline to SDB to recovery either (Fig. 3B).

178

179 The structure of the latency distribution had a common characteristic feature; HBs were unlikely  
180 to occur during the short period of time (~200 ms) before inspiratory onset (Fig. 2). Thus, the  
181 maximal positive difference between the CDF and the uniform distribution was observed right at  
182 the beginning of this period (see  $x$  coordinates of the red bars in Figure 2). We used the  
183 corresponding times to estimate the characteristic latency for each individual between the last HB  
184 and the onset of inspiration in each experimental condition (see group data in Figure 3B). We  
185 found that this latency was consistent across individuals and did not depend on experimental  
186 conditions.

187

188 ***Pressure pulses delivered during expiration evoke a delay in the inspiratory onset in the rodent***  
189 ***artificially perfused, brainstem preparation.***

190

191 As noted, the prevailing cardiac-trigger hypothesis is that arterial baroreceptors mediate the  
192 interaction between HBs and the respiratory rhythm generator. Baekey *et al.* (2010) correlated  
193 arterial pressure and respiratory activity in the artificially perfused brainstem preparation in rats  
194 (Fig. 4A). Specifically, isolated and solitary pressure pulses during the expiratory phase of the  
195 breathing cycle enhanced post-I activity, attenuated augmenting expiratory activity (aug-E) and  
196 delayed the onset of next inspiration (Fig. 4B).

197

198 We analyzed these data further (Fig. 5). The eupneic respiratory cycle consists of three phases:  
199 inspiration, post-inspiration and late expiration (E2), during each of these phases different  
200 populations of respiratory neurons are active. First, we confirmed that the effect of a single  
201 pressure pulse depended on the respiratory phase in which it was delivered. We found that  
202 pressure pulses during inspiration had no significant effect on inspiratory phase duration ( $-4.9 \pm$   
203  $1.7\%$  (mean  $\pm$  SE hereinafter),  $p = 0.055$ ), while pulses during post-inspiration or E2 significantly  
204 prolonged expiratory duration: pulses delivered during post-inspiration increased time of  
205 expiration by  $15.1 \pm 2.4\%$ ,  $p < 0.001$ ; pulses delivered during E2 phase increased time of  
206 expiration by  $18.4 \pm 3.6\%$ ,  $p = 0.008$  (Fig. 5). Even though a significant difference was not  
207 apparent between pulses during post-I versus E2 phases, pulses during E2 phase tended to have a  
208 stronger effect on expiratory duration, which was consistent with Baekey *et al.* (2010) report.

209



210 ***During baroreceptor stimulation, post-inspiratory (post-I) neuron activity is increased, and***  
211 ***augmenting expiratory (aug-E) neuron activity is decreased in the Bötzing complex (BötC) of***  
212 ***rodents.***

213  
214 There are two major phenotypes of expiratory neurons. Post-I neurons, which are active in the  
215 first part of expiration have their maximal firing rate at the beginning of expiration and exhibit a  
216 decrementing firing pattern during expiration. Aug-E neurons fire after post-I neurons during  
217 expiration with an augmenting firing rate that terminate abruptly before the subsequent inspiration  
218 (see gray traces in Fig. 6A, B, upper panels). Baekey *et al.* (2010) reported a pair of  
219 simultaneously recorded post-I and aug-E during pressure pulses. The firing of the post-I neuron  
220 increased while the aug-E neuron decreased during the pressure pulse (see Figure 5 in (Baekey *et*  
221 *al.*, 2010). To quantify this effect, we calculated the percent difference in average firing rate of  
222 post-I and aug-E neurons between unperturbed respiratory cycles and cycles with pressure pulses  
223 during expiration. We also calculated the same measure for the inspiratory neurons when the  
224 perturbation was delivered during inspiration (see group data in Fig. 6C). We found that  
225 inspiratory neurons did not change their firing rate significantly during pressure pulses coincident  
226 with inspiration ( $p = 0.95$ ), which was consistent with no change in inspiratory duration when  
227 pulses arrived during inspiration. However, if the pulse occurs during expiration, post-I neurons  
228 increase their average firing rate by  $27.8 \pm 5.9\%$  ( $p = 0.047$ ) and aug-E neurons decrease their  
229 average firing rate by  $39.2 \pm 5.8\%$  ( $p = 0.002$ ). A closer look at their firing profiles showed that  
230 post-I neurons increase their firing right after the pressure pulse arrives (Fig. 6A) and continue  
231 firing until the pressure deviation ends, which coincides with the onset of the next inspiration. The  
232 effect on aug-E firing is largely opposite. These neurons reduce their firing right after the pressure  
233 pulse starts and then gradually come back as the pressure returns to its baseline (Fig. 6B).

234  
235 ***Mathematical modeling of baroreceptor input to post-I neurons of the respiratory central***  
236 ***pattern generator (CPG) explains the effects of baro-stimulation in rodents.***

237  
238 Baekey *et al.* (2010) hypothesized that the delay in inspiratory onset induced by perfusion  
239 pressure pulses was mediated by arterial baroreceptor input to the brainstem expiratory neurons.  
240 They demonstrated the plausibility of this hypothesis by computational modeling, that second-



241 order baroreceptor neurons in the *nucleus tractus solitarii* (nTS) send excitatory projections to the  
242 post-I neurons in the BötC. We implemented the same idea in a simpler and more mathematically  
243 tractable rate-based model of the respiratory CPG first published by Rubin *et al.* (2009) and then  
244 tested by other researchers against a large number of experimental findings, e.g. (Rubin *et al.*,  
245 2011; Molkov *et al.*, 2014; Ausborn *et al.*, 2018). Populations of neurons of the same phenotype  
246 in this model are described in terms of population firing rate, which is a predefined monotonous  
247 function of average membrane potential over the population (see Methods). Membrane potential  
248 dynamics follows conductance-based description similar to typically used in Hodgkin-Huxley-  
249 like formalism but with spiking currents excluded. We assumed that the conductances of  
250 excitatory and inhibitory synaptic channels depended linearly on the firing rates of projecting  
251 presynaptic populations with coefficients representing synaptic weights of the corresponding  
252 connections.

253  
254 According to Smith *et al.* (2007) whose work was a basis for the model by Rubin *et al.* (2009),  
255 the apneic respiratory pattern is a result of intrinsic dynamical properties of, and synaptic  
256 interactions between, neurons in preBötC and BötC of medulla oblongata (Fig. 7). PreBötC  
257 mostly contains inspiratory neurons (*i.e.* those that fire during inspiration) and BötC mostly  
258 contains expiratory neurons. There is a large population of excitatory recurrently connected  
259 inspiratory neurons in preBötC which is capable of endogenous rhythm generation in isolation  
260 (Smith *et al.*, 1991). Endogenous bursting depends on the expression of persistent sodium current  
261 in a subpopulation of these neurons (Koizumi & Smith, 2008). The expiratory neurons are  
262 represented, as noted, by two mutually inhibiting populations with post-I and aug-E discharge  
263 patterns. They also reciprocally interact with an inhibitory population of preBötC inspiratory  
264 neurons labelled early-I in Fig. 7.

265  
266 The succession of respiratory phases in the model occurs as follows (see (Smith *et al.*, 2007) and  
267 (Rubin *et al.*, 2009) for mechanistic and mathematical details, respectively). Post-I and early-I  
268 neuronal populations form a half-center oscillator based on their mutual inhibition and spike-  
269 frequency adaptation properties. Due to the latter, both have decrementing activity patterns (Fig.  
270 8). Adaptation of post-I firing disinhibits aug-E neuron activity, which emerges at some point of  
271 expiratory phase and then gradually increases towards the end of expiration. In our extension of

272 the model, we assumed that the pressure pulse induces a baroreceptor activity profile as shown by  
273 the bottom trace in Fig. 8. This profile was used as a direct excitatory synaptic input to the post-I  
274 population (red arrow from nTS to post-I in Fig. 7). So, for the duration of this input the firing  
275 rate of the post-I population was increased which led to a delayed transition from expiration to  
276 inspiration in that respiratory cycle (see dashed traces in Fig. 8). Besides, due to increased post-I  
277 activity during baroreceptor activity pulse, aug-E activity was depressed.

278  
279 In summary, the model explains the delay in the inspiratory onset after baro- stimulation as well  
280 as the changes in neuronal discharge patterns by excitatory synaptic inputs from nTS baroreceptor  
281 neurons to the post-I population of the respiratory CPG. Importantly, as long as the pulse arrives  
282 late enough in expiration, the duration of the baroreceptor activity pulse defines the duration of  
283 the delay.

284  
285 ***Mathematical modeling of repetitive baroreceptor input to post-I neurons from HB-produced***  
286 ***pressure pulses creates a HB distribution similar to human data.***

287  
288 We implemented a cardio-respiratory mathematical model that includes several interaction  
289 mechanisms between the two systems. The model is based on our previous work (Molkov *et al.*,  
290 2013; Molkov *et al.*, 2014) where we incorporated feedback (also known as Hering-Breuer reflex)  
291 from pulmonary stretch receptors to the central respiratory neural circuits. We included a simple  
292 model of the heart to generate HB times as a Poisson process with the rate modulated by the  
293 respiratory activity. We engineered this modulation to produce CRC/RSA consistent with the one  
294 we published based on the analysis of the same experimental group (Barnett *et al.*, 2020). We  
295 borrowed the model of arterial pressure dynamics from the same publication, which shows  
296 pulsatile dynamics of the pressure with slow respiratory modulation (Traube-Hering waves).  
297 Finally, we included a simple model of baroreceptor activity as a signal proportional to the excess  
298 of arterial pressure over a certain threshold and used this signal as an excitatory input to the post-I  
299 neurons of the respiratory CPG. We used the synaptic weight of this input as an independent  
300 parameter that defines the CVC gain. Figure 9 shows the dynamics of the main physiological  
301 outputs simulated by the model in comparison with their experimental counterparts for both  
302 baseline and SDB conditions.

303

304 In Fig. 10A, we present simulation results for the HB distribution in the same format as the  
305 human data in Figure 2. These simulations had the same durations as experimental recordings.  
306 For all three conditions (baseline, SDB and recovery) HB distributions exhibit a range of latencies  
307 immediately preceding the onset of inspiration (0) where HBs were unlikely to occur. The  
308 characteristic latency between the last HB and the onset of inspiration (calculated in the same way  
309 as we did for data; see above) was about 200 ms for simulations of baseline conditions.  
310 Interestingly, the characteristic latency during simulated SDB was slightly longer (~300ms).

311

312 Our model had two coupling mechanisms between respiratory and heart rhythms, we evaluated  
313 their individual contributions to the CVC phenomenon in the model. First, we removed the  
314 baroreceptor input to the post-I neurons of the respiratory CPG and repeated the same  
315 simulations. We found that without this input the distribution of HBs becomes statistically  
316 indistinguishable from the uniform distribution (Fig. 10B) meaning that there is no CVC. In  
317 contrast, CVC remained after removing respiratory modulation of the heart rate (RSA) so RSA  
318 did not affect the distribution of HBs relative to inspiratory onset. (Fig. 10C).

319

## 320 **Discussion**

321

322 The coupling of the respiratory and the cardiovascular systems is observed in a number of  
323 physiological scenarios. One key manifestation of such coupling is CVC in which a HB is more  
324 likely (or unlikely) to occur during certain phases of the respiratory cycle. The present study  
325 examines a neural mechanism by which the cardiovascular system can affect the respiratory  
326 pattern. Using a combination of human data, *in situ* animal data and mathematical modeling, we  
327 test the hypothesis that systolic peak pressure activates arterial baroreceptors and initiates CVC.  
328 This aspect of CVC is consistent with the cardiac-trigger hypothesis. However, when triggered,  
329 the baroreceptor afferent input through a pauci-synaptic neural pathway to the respiratory CPG  
330 delays the onset of the inspiration by activating the expiratory neurons. Thus, the underlying  
331 neural mechanism of CVC differs from that alluded to by the cardiac-trigger hypothesis in that it  
332 delays rather than initiates a phrenic burst.

333

334 In supine resting humans, SDB strengthens the magnitude of RSA and Traube-Hering waves  
335 (Dick *et al.*, 2014b; Barnett *et al.*, 2020), but CVC remains robust and unaffected. Thus, CVC is  
336 determined by an independent mechanism from that of RSA and TH waves and distinct from that  
337 of respiratory modulation of autonomic activity. There are several key experimental observations  
338 supporting the concept that baroreceptor responsiveness to blood pressure fluctuations mediate  
339 CVC.

340  
341 First, transient increases in blood or perfusion pressure *in vivo* and *in situ* evoke an expiratory  
342 facilitatory reflex with the recruitment of expiratory motor activity and an increase in the duration  
343 of expiration (Bishop, 1974; Baekey *et al.*, 2008; Baekey *et al.*, 2010). The evoked cardio-  
344 sympatho-respiratory response depends on the respiratory phase (Baekey *et al.*, 2008). Thoracic  
345 sympathetic activity and HR decreased whether the pulse was delivered in inspiration, post-  
346 inspiration or E2 phases. The magnitude of the autonomic decreases was respiratory phase  
347 dependent with the least effect occurring during inspiration, and the greatest in post-inspiration.  
348 While duration of expiration was not prolonged when the pulse was delivered in inspiration, it  
349 was prolonged following pressure pulses delivered in the post-I and E2 phases. The evoked  
350 response also depended on the magnitude of the pressure pulse. A pressure pulse as weak as 18  
351 mmHg (or ~25% above the mean perfusion pressure) evoked sympatho-respiratory response, in  
352 which sympathetic activity was inhibited and the TE was prolonged but the decrease in HR was  
353 minimal (Baekey *et al.*, 2008).

354  
355 Second, arterial pressure pulses resulting from the HB do modulate respiratory neuronal activity.  
356 Our previous studies in cats indicate that pulse pressure modulated expiratory activity recorded  
357 from isolated single brainstem neurons (Dick & Morris, 2004; Dick *et al.*, 2005). Thus, the same  
358 neuron can express respiratory and pulse modulated activity. Once we realized this, it became an  
359 issue of identifying if this was simply a cardio-sympathetic control neuron expressing respiratory  
360 modulation or a respiratory neuron being baro-modulated. To resolve this, we characterized the  
361 axonal projection of the recorded neurons and identified recurrent laryngeal motoneurons and  
362 excitatory premotor inputs to the recurrent laryngeal motoneuronal pool (Dick *et al.*, 2005). In  
363 these subgroups, we found that expiratory activity was preferentially affected by baroreceptor  
364 inputs and that activity could be facilitated or inhibited following a HB.

365  
366 Third, breathing pattern variability depends on baroreceptor input. We (Dick *et al.*, 2014a) and  
367 others (Galletly & Larsen, 1999) have noted that baroreceptor input increases ventilatory  
368 variability. In our study in anesthetized rats, variability of the respiratory frequency differed  
369 depending on whether the rodents had been conditioned to either chronic intermittent or sustained  
370 hypoxia (Dick *et al.*, 2014a). After chronic intermittent hypoxic conditioning, CRC was strong  
371 and had minimal respiratory frequency variability, whereas after chronic sustained hypoxic  
372 conditioning CRC was weak and respiratory frequency variability greater. Surprisingly, this high  
373 respiratory frequency variability depended on the aortic depressor and carotid sinus nerves being  
374 intact (Dick *et al.*, 2014a). In anesthetized humans, four types of coupling patterns occurred.  
375 Variability in respiratory frequency was lowest when the HB had a consistent number of beats,  
376 generally 3 or 4 beats, per breath. In contrast, coupling patterns in which the number of beats per  
377 breath varied resulted in a variable respiratory frequency. The respiratory cycle duration would  
378 transition or oscillate and maintain an integer relationship for HBs per breath (Galletly & Larsen,  
379 1999).

380

### 381 ***Limitations and future directions***

382

383 Tonic arterial baroreflex afferent activity is modified acutely throughout the cardiac cycle and HB  
384 to HB. The arterial baroreceptors are most active during the rising phase of arterial pressure with  
385 each HB and their activity is dynamic in relation to blood pressure. The change in arterial  
386 pressure is a key determinant of tonic activity in the baroreceptor neurons. The rate of pressure  
387 change, the duration of the pulse, prolonged changes in pressure, and baroreceptor adaptation are  
388 all related to changing central baroreflex afferent input. Therefore, it is essential that we consider  
389 that a longer pressure pulse (such as delivered in the *in situ* experiments in this paper) or an  
390 overall shift in mean blood pressure during exercise or hypertension in humans may indeed reveal  
391 different results than the transient baro-activation over the course of the systolic phase of a single  
392 cardiac cycle. This is a recognized limitation of the study and supports additional studies to  
393 explore differences, if any, resulting from the use of the baroreflex activation pattern with the  
394 width of a single cardiac cycle versus a longer period of activation. For example, the use of lower  
395 body positive pressure is a longer baroreflex challenge than is brief neck pressure. Therefore,

396 interpretation of those studies as it pertains to the relationship between baroreflex and ventilatory  
397 control should consider the nature of the afferent input under different pressure profiles. Also  
398 studies in humans that involve a sustained increase in arterial pressure or baroreflex gain  
399 resetting—such as intense exercise or studies in hypertensive patients—would be useful to better  
400 characterize CVC.

401  
402 A phenomenon that inspired this study was CVC, manifested by a well-defined latency between  
403 the last HB during expiration and the inspiratory onset (Fig. 1). This latency did not depend on  
404 experimental conditions, *i.e.* normal vs. slow deep breathing, although the participants were  
405 relaxed and calm in both conditions (Fig. 3). In our simulations we observed that the latency  
406 increased as we reduced the frequency in the model to mimic SDB. We simulated SDB by  
407 reducing excitatory drive to key respiratory populations thus decreasing their excitability. We  
408 theorize that the stereotypic latency between the last HB and inspiratory phase is caused by the  
409 transient baroreceptor input to expiratory neurons and that the profile of this input is dictated by  
410 the arterial pressure, which gradually relaxes between HBs. The increased latency for the  
411 expiratory-to-inspiratory transition occurs in the model due to reduced excitability of simulated  
412 neuronal populations while the strength of the external baroreceptor input remained the same.  
413 Therefore, the expiratory-to-inspiratory transition required the simulated blood pressure to fall to  
414 lower levels during SDB compared to normal breathing. This, however, implies a specific control  
415 mechanism that participants employ to implement slow deep breathing pattern.

416  
417 Experimentally, the latency between the last HB and inspiration was invariant during normal and  
418 SDB suggesting that our mathematical implementation of breathing control had flaws. In this  
419 study, we focused on a coupling mechanism between cardiovascular and respiratory systems and  
420 used a popular model for respiratory rhythm generation. It would be interesting in the future,  
421 however, to explore whether other respiratory control mechanisms are compatible with the  
422 latency invariance above.

423

424 ***Relevance***

425

426 The direct coupling of inspiratory onset control to the cardiovascular system has important  
427 functional consequences. Inspiration facilitates the “respiratory pump” and can maintain stroke  
428 volume during hypovolemia (Skytjoti *et al.*, 2018). Convertino (2019) summarized the  
429 importance of the changes in intrathoracic pressure during inspiration to facilitate the respiratory  
430 pump in a range of hypovolemic conditions including hemorrhage and orthostatic hypotension.  
431 As such, rapid communication between the arterial baroreceptors and inspiratory control would be  
432 advantageous. Indeed, using several approaches, it has been reported that there is a relationship  
433 between blood pressure and ventilation with low pressure associated with high ventilation and  
434 vice versa. The later observation is aligned with our conclusion that baroreflex activation with  
435 high pressure delays inspiratory onset.

436  
437 Lower body negative pressure, neck suction, and brief infusions of vasoactive drugs acutely alter  
438 baroreflex activity through transient changes in blood pressure. These techniques offer insight  
439 into the reciprocal interactions between arterial baroreflex and ventilatory control in humans.  
440 During lower body negative pressure, which unloads the carotid baroreceptors as blood volume is  
441 shifted to the lower limbs, ventilation and the respiratory pump are greatly increased (Koehle *et*  
442 *al.*, 2010). Lower body positive pressure, which activates the baroreceptors as central blood  
443 volume and stroke volume increase, does not result in changes in ventilation. Our studies support  
444 that baroreceptor stimulation delays inspiratory onset; however, in the longer-term steady state  
445 increase in pressure generated by lower body positive pressure ventilation rate is unchanged. The  
446 duration of the baroreflex triggering and a baroreflex resetting to prolonged activation should be  
447 considered.

448  
449 Further, pharmacological interventions aimed at changes in blood pressure alter ventilatory rate  
450 with increased blood pressure decreasing ventilation and vice versa (Stewart *et al.*, 2011). There  
451 is a striking stimulation of ventilation, in particular of tidal volume, during rapid pharmacological  
452 infusion of vasoactive drugs (Oxford Maneuver) in human subjects. This so-called “ventilatory  
453 baroreflex” is not related to chemoreflex and the mechanisms are still under investigation  
454 (Stewart *et al.*, 2011).

455



456 While generally considered to be baroreflex mediated, the above interventions may also have  
457 interaction with the chemoreflex. For example, hypoxic ventilatory response mediated by the  
458 peripheral chemoreceptors is increased during lower body negative pressure (Koehle *et al.*, 2010).  
459 During severe hemorrhage combined with hypoxia there is activation of the peripheral  
460 chemoreceptors in the carotid body but this does not occur with low blood volume alone (Kumar  
461 & Prabhakar, 2012). That being said, the hyperventilation triggered in low volume states is  
462 associated with hypocapnia which is not a stimulus to the central chemoreceptors. Low volume  
463 alone did not result in activation of the peripheral chemoreceptors unless combined with low  
464 oxygen.

465

### 466 ***Conclusion***

467

468 Using a combination of animal data, human data and mathematical modeling, we explored the  
469 underlying mechanisms of CVC. We hypothesized that the HB derived pressure pulses entrained  
470 the respiratory pattern via baroreceptor mediated modulation of the initiation of inspiration. As  
471 each HB triggers blood pressure pulses and baroreceptor activation, a neural pathway that inhibits  
472 an inspiration is activated thus affecting the timing of the inspiration onset. If correct, it would be  
473 likely that the latency between a HB directly preceding inspiration and the inspiratory onset  
474 would depend on the duration of baroreceptor activity pulse and the transmission time to the  
475 ventral respiratory column. This hypothesis was further tested by using an SDB protocol in  
476 human subjects to probe if breathing can alter the linkage of HB to inspiration, and using an *in*  
477 *situ* brainstem-heart rodent model preparation in which pressure pulses can be introduced during  
478 different phases of respiration to test how the timing of the next inspiration is affected when the  
479 timing of baroreflex input to the brainstem is changed. We conclude that baroreflex activation  
480 modulates inspiration timing through a pauci-synaptic circuit from the baroreceptors to the ventral  
481 medullary respiratory column. Specifically, a transient pressure pulse during expiration increased  
482 post-I neuronal activity, decreased aug-E activity transiently, and delayed the next inspiration.  
483 The model supported the notion that baroreceptor input to post-I neurons accounted for CVC.

484

485 In summary, key findings of this study are: 1) In the human subjects, there was a stereotypic  
486 latency (~200 ms) from the last HB during expiration to the onset of inspiration in both

487 involuntary and voluntary breathing. The latency was unaltered during SDB; 2) In the rodent  
488 preparation, triggering of baroreflex input via an experimental pressure pulse during expiration  
489 resulted in a delay in the onset of the next inspiration, 3) During *in situ* baroreceptor stimulation,  
490 activity of the post-I neurons is increased, and aug-E activity is decreased in BötC, and 4) Finally,  
491 the model shows that baroreceptor input to post-I neurons of the respiratory CPG may be  
492 responsible for the effect while RSA has no influence on CVC. Taken together, the data support  
493 the hypothesis that the HB, by way of pulsatile baroreflex activation, controls the initiation of  
494 inspiration. This occurs through a rapid neural activation loop from the carotid baroreceptors to  
495 BötC expiratory neurons and the phrenic nerve in only a few synapses.

496

## 497 **Material and Methods**

498

### 499 *Human Subjects*

500

501 Subjects were young, healthy, yoga-naive males (N = 10, mean age  $26.7 \pm 1.4$ ). A subset of data  
502 from this same subject pool was previously reported for analysis of blood pressure variability.  
503 Screening, consenting procedures, and details of instrumentation are the same as already reported  
504 (Dick *et al.*, 2014b). Briefly, subjects were in the supine position during consecutive 20-min  
505 epochs of baseline breathing, uncoached slow deep breathing (SDB), and recovery breathing.  
506 Continuous monitoring was done for catheter-based brachial artery blood pressure, Lead II  
507 electrocardiogram, and calibrated double pneumobelt. The experiments and procedures were  
508 approved by the Institutional Review Board at the Mayo Clinic and conformed to the Declaration  
509 of Helsinki. All subjects signed an approved informed consent form. The data were de-identified  
510 to comply with HIPAA rules and regulations for data analysis. Further de-identification permitted  
511 data sharing without additional IRB approval.

512

### 513 *Rats (in situ preparation)*

514

515 Rats (male, juvenile 50-100g) were pretreated with heparin sodium (1000 units, i.p.) and deeply  
516 anesthetized with isoflurane, bisected sub-diaphragmatically. We placed the rostral half of the rat  
517 in a cold (10°C) Ringer solution (containing, mm: NaCl, 125; NaHCO<sub>3</sub>, 25; KCl, 3; CaCl<sub>2</sub>, 2.5;

518 MgSO<sub>4</sub>, 1.25; KH<sub>2</sub>PO<sub>4</sub>, 1.25; and dextrose, 10), where they were decerebrated pre-collicularly  
519 and had their skin, viscera, the left ribcage, diaphragm, lungs, and thoracic connective tissue  
520 removed; and then finally, the distal end of the descending aorta was freed for the perfusion  
521 cannula and the left phrenic was dissected free of connective tissue and desheathed for recording.  
522 The *in situ* preparation was moved to a recording chamber, cannulated and perfused retrogradely  
523 through the descending aorta with a modified Ringer's solution (artificial cerebrospinal fluid -  
524 aCSF) saturated with 95% O<sub>2</sub>/5% CO<sub>2</sub>, and paralyzed with vecuronium bromide. Perfusion  
525 pressure was adjusted by manipulation of peristaltic pump's rotation speed and by administration  
526 of supplemental vasopressin. After placement of the peripheral nerves in the recording electrodes,  
527 respiratory efforts were re-established by gradually increasing perfusion pressure and  
528 temperature. Motor activity patterns were recorded from the central end of the vagus, thoracic  
529 sympathetic and phrenic nerves.

530  
531 The multi-electrode array was fitted to an electrode manipulator, which fit a stereotaxic frame.  
532 The microelectrodes (n=16, 10–12 MΩ) were aligned perpendicularly to the dorsal medullary  
533 surface. We placed eight electrodes bilaterally in two rows of four that paralleled the midline. The  
534 electrodes in the two rows were separated 250-μm, while electrodes within each row were  
535 separated by 300 μm. We used stereotaxic coordinates to position electrodes bilaterally in the  
536 rostral lateral medulla. We could position the depth of each electrode in steps as small as a micron  
537 and could adjust the electrode to optimize signal-to-noise ratio and to isolate the recording of  
538 activity to a single source. We characterized neuron recording by the peak of their activity during  
539 the respiratory cycle and the stereotaxic location of the electrode tip. In cases where more than  
540 one neuron was recorded on a single electrode, we discriminated single units using a voltage  
541 threshold and then confirmed single units using principal component analysis (spike sorting).  
542 The protocol included at least a 15-min baseline recording followed by characterizing the  
543 responses to transient increases in the perfusion pressure to activate arterial baroreceptors with 3-  
544 5 min interval between repeated activations of the baroreceptors.

545  
546 We performed data analysis off-line from the Spike-2 files. Data were filtered from 100 to 3 kHz  
547 and the analog signal was sampled at 10kHz. The recorded data include: PNA, tSNA, ECG and  
548 extracellular potentials from the microelectrode array. PNA was processed by removing DC

549 offset, rectification and smoothing using a 50-ms time constant to obtain a moving-time average  
550 of activity. From this ‘integrated’ PNA, we marked the onsets of inspiratory and expiratory  
551 phases. Action potentials of single neurons were converted to times of occurrence, *i.e.* spike trains  
552 (Fig. 5B).

553

### 554 *Analysis of human physiological data*

555

556 The detection of respiratory phase changes in human ventilatory data in this dataset has been  
557 previously described (Barnett *et al.*, 2020). Here, we constructed a probability density function  
558 (PDF) for heartbeats relative to the onset of inspiration for each of the three experimental epochs  
559 in each participant by collecting the times of each R-peak that happened within the 0.5 s interval  
560 immediately preceding the onset of inspiration. Each PDF was normalized and then integrated to  
561 produce a heartbeat cumulative distribution function (CDF), which could then be analyzed. We  
562 used the Kolmogorov-Smirnov test to determine whether CVC was present in these physiological  
563 recordings: the heartbeat cumulative distribution CDF was compared to the CDF of the uniform  
564 distribution.

565

566 In order to characterize the distribution of heartbeats preceding the onset of inspiration, we  
567 produced two metrics. For the first metric, we detected the maximum positive difference between  
568 the heartbeat CDF and the CDF of the uniform distribution. For the second metric, we recorded  
569 difference between the onset of inspiration and the time where the positive difference between the  
570 heartbeat CDF and the CDF of the uniform distribution was maximal. For the statistical analysis  
571 of these metrics, comparisons among groups were carried out using the CAR and PMCMRplus  
572 libraries for the R computing environment. Comparisons among the three experimental epochs  
573 were performed using a one-way repeated measures ANOVA or if group data were not normal  
574 with the Friedman test. In neither case (Fig. 3) were these comparisons significant, and post-hoc  
575 tests were not performed.

576

### 577 *Analysis of rat recordings*

578

579 In rat recordings, we quantified the change in respiratory phase duration and the change in  
580 neuronal firing rate in cycles during which a baroreflex stimulation was performed. We  
581 designated cycles during which there was no stimulation as control cycles.

582  
583 We analyzed and compared neuronal firing rates between control and perturbed cycles. For  
584 expiratory neurons in control cycles, we averaged the firing rate of neurons during expiration.  
585 Since the expiration duration was altered in perturbed cycles, we averaged the firing rate of  
586 neurons over the time interval that began at the beginning of expiration and ended after the  
587 average duration of expiration for control cycles in that cell. For inspiratory neurons in both  
588 control cycles and perturbed cycles, we averaged the firing rate of the cell over the duration of  
589 inspiration. We compared neuronal firing rates for control vs perturbed cycles using the paired t-  
590 test. The threshold for significance was 0.05.

591  
592 We analyzed and compared respiratory phase durations between control and perturbed cycles. We  
593 separated the expiratory phase into the post-inspiratory phase and the late expiratory phase. The  
594 post-inspiratory phase lasted for 20% of the duration of the average expiration duration for  
595 control cycles. We compared respiratory phase durations between control and perturbed cycles  
596 using the Wilcoxon signed-rank test. The threshold for significance was 0.05.

597  
598 Analysis and comparison of rat data were performed in Python using the Numpy, Scipy, and  
599 Pandas libraries.

600

## 601 **Model description**

602

603 We developed two computational models of the brainstem respiratory circuitry: a simple model of  
604 baroreceptor stimulation in the rat, and a closed-loop model of blood-pressure derived  
605 baroreceptor activation in human beings. These two models shared fundamental core connectivity  
606 of the respiratory neuronal populations in the Bötzing and pre-Bötzing complexes, which was  
607 informed by brainstem transection experiments (Smith *et al.*, 2007). As in (Rubin *et al.*, 2009;  
608 Rubin *et al.*, 2011), the model of the respiratory circuitry produced an average membrane

609 potential for each neuronal population, which was transformed into the firing rate of that  
610 population.

611

612 *Model of rodent baroreceptor activation*

613 By incorporating some critical slow intrinsic ionic conductances, this model captures the  
614 experimentally observed firing rate profiles of respiratory neurons. The average membrane  
615 potential of each neuronal population was determined by the following current balance equation:

616

$$C \frac{dV_i}{dt} = -I_i - \bar{g}_K n_\infty^4(V_i)(V_i - E_K) - \bar{g}_L(V_i - E_{Li}) - \bar{g}_E s_i(V_i - E_E) - \bar{g}_I q_i(V_i - E_I) + Baro_i$$

617

618 From  $V_i$ , we computed the firing rate for each neuronal population with the piecewise-linear  
619 function  $f(V)$ :

620

$$f(V) = \begin{cases} 0, & \text{if } V < -50 \text{ mV} \\ (V + 50)/30, & \text{if } -50 \text{ mV} \leq V \leq -20 \text{ mV} \\ 1, & \text{if } V > -20 \text{ mV} \end{cases}$$

621

622 All five of the neuronal populations possessed a delayed rectifier potassium current and a leak  
623 current. The leak current was parameterized by its conductance,  $\bar{g}_L$ , and its reversal potential,  $E_L$ .  
624 The delayed rectifier potassium current was parameterized by its conductance,  $\bar{g}_K$ , and the  
625 reversal potential of potassium,  $E_K$ . The steady state activation of this potassium current was  
626 expressed as  $n_\infty(V) = 1/(1 + \exp(-(V + 30)/4))$ .

627 In the current balance equation, the additional intrinsic currents represented by  $I_i$  differed  
628 by neuronal population and defined the firing rate responses of each neuronal population to  
629 synaptic input. In the pre-I/I population ( $i = 1$ ),  $I_i$  was composed of a slowly inactivating  
630 persistent sodium current:  $I_{NaP} = \bar{g}_{NaP} m_\infty(V) h(V - E_{Na})$ . The current was parameterized by its  
631 maximal conductance,  $\bar{g}_{NaP}$ , and the sodium reversal potential,  $E_{Na}$ . The activation of its  
632 conductance was defined by its steady state voltage dependence:

633

$$m_\infty(V) = 1/(1 + \exp(-(V + 40)/6))$$

634

635 The inactivation of the persistent sodium current,  $h$ , was defined by the differential equation:  
636

$$\tau_h(V) \frac{dh}{dt} = h_\infty(V) - h$$

637 .  
638 The steady state voltage dependence of  $h$  was defined by  $h_\infty(V) = 1/(1 + \exp((V + 55)/10))$ ,  
639 and its time constant was expressed as  $\tau_h(V) = \tau_{NaP}/\cosh((V + 55)/10)$ . In the early-I  
640 population ( $i = 2$ ),  $I_i$  was composed of an adaptive potassium current  $I_{AD} = \bar{g}_{AD}m(V - E_K)$ ,  
641 which was parameterized by its maximal conductance,  $\bar{g}_{AD}$ , and the reversal potential of  
642 potassium,  $E_K$ . The activation of  $I_{AD}$  was determined by the differential equation  
643

$$\tau_{m,i} \frac{dm_i}{dt} = K_i f(V_i) - m_i$$

644 .  
645 The steady state activation of  $I_{AD}$  was determined by the firing rate of the population and the  
646 scaling factor  $K_i$ . In the aug-E population ( $i = 3$ ), there were no additional intrinsic currents  
647 ( $I_i = 0$ ). In the post-I population ( $i = 4$ ),  $I_i$  was composed of an adaptive potassium current  
648  $I_{AD} = \bar{g}_{AD}m(V - E_K)$ ; its dynamics are described above. This neuronal population also possessed  
649 the baroreceptor input stimulus,  $Baro$ , which was defined by the following differential equation:  
650

$$\tau_{Baro} \frac{dBaro}{dt} = Baro_\infty - Baro$$

651  
652 The parameter values for  $Baro_\infty$  and  $\tau_{Baro}$  were 0 nA and 1 s, respectively, while baroreceptor  
653 activation was absent. The values for biophysical parameters are given in Table 1.  
654 The firing rate of each population determined the instantaneous conductance of its synaptic  
655 current in post-synaptic populations. The excitatory ( $s_i$ ) and inhibitory ( $q_i$ ) synaptic activations  
656 were determined by the activity of presynaptic populations as described by

$$s_i = \sum_{j=1}^5 a_{ji} f(V_j) + c_i$$



$$q_i = \sum_{j=1}^5 b_{ji} f(V_j),$$

657 where  $f(V_j)$  is the neuronal firing rate of the presynaptic population. The synaptic weight  $a_{ji}$   
 658 corresponds to the specific strength of the excitatory projection from population  $j$  to population  $i$ .  
 659 The synaptic weight  $b_{ji}$  corresponds to the specific strength of the inhibitory projection from  
 660 population  $j$  to population  $i$ . The synaptic weight  $c_i$  represents a tonic excitatory drive to  
 661 population  $i$ . The magnitude of these weights can be found in Table 2. Simulations were  
 662 performed in MATLAB using the ode15s solver (AbsTol = 1e-7, RelTol = 1e-5, and MaxStep =  
 663 10).

664

665 **Table 1.** Values for parameters for the model of rodent baroreceptor activation.

|                                  |                               |                            |                          |
|----------------------------------|-------------------------------|----------------------------|--------------------------|
| $C = 20 \text{ pF}$              | $g_L = 2.8 \text{ nS}$        | $E_L = -60 \text{ mV}$     | $g_I = 60 \text{ nS}$    |
| $g_E = 10 \text{ nS}$            | $E_I = -75 \text{ mV}$        | $E_E = 0 \text{ mV}$       | $g_K = 5 \text{ nS}$     |
| $E_K = -85 \text{ mV}$           | $g_{NaP} = 5 \text{ nS}$      | $\tau_{NaP} = 4 \text{ s}$ | $E_{Na} = 50 \text{ mV}$ |
| $g_{AD} = 10 \text{ nS}$         | $\tau_{AD} = 2 \text{ s}$     | $K_2 = 1$                  | $K_4 = 2$                |
| During baroreceptor stimulation: |                               |                            |                          |
| $Baro_{\infty} = 0.3 \text{ nA}$ | $\tau_{Baro} = 50 \text{ ms}$ |                            |                          |
| Otherwise:                       |                               |                            |                          |
| $Baro_{\infty} = 0 \text{ nA}$   | $\tau_{Baro} = 1 \text{ s}$   |                            |                          |

666

667

668 **Table 2.** Weights of synaptic connections among neuronal populations.

669

|          | Pre-I/I  | Early-I  | Aug-E    | Post-I   | Drive |
|----------|----------|----------|----------|----------|-------|
| Synaptic | $a_{1i}$ | $b_{2i}$ | $b_{3i}$ | $b_{4i}$ | $c_i$ |

| Weights |      |      |      |      |      |
|---------|------|------|------|------|------|
| Pre-I/I |      |      | 0.15 | 1    | 0.02 |
| Early-I | 0.15 |      | 0.05 | 0.42 | 0.6  |
| Aug-E   |      | 0.42 |      | 0.25 | 0.45 |
| Post-I  |      | 0.22 |      |      | 0.6  |

670

671

672 *Model of human cardiorespiratory interaction*

673

674 We extended and adapted our model of rodent baroreceptor activation to simulate human  
 675 cardiorespiratory interaction by incorporating the HB, blood pressure, and the tidal volume of the  
 676 lungs.

677

$$678 \quad C \frac{dV_i}{dt} = -I_i - \bar{g}_K n_\infty^4(V_i)(V_i - E_K) - \bar{g}_L(V_i - E_{Li}) - \bar{g}_E s_i(V_i - E_E) - \bar{g}_I q_i(V_i - E_I) - I_{NTS,i}.$$

679

680 This model included an additional neuronal population, which was responsible for the inspiratory  
 681 output of the respiratory CPG. The ramp-I population ( $i = 5$ ) possessed a leak current, and a  
 682 delayed rectifier potassium current, but there were no additional intrinsic currents ( $I_i = 0$ ). The  
 683 intrinsic currents of the pre-I/I, early-I, and aug-e populations are identical to those described in  
 684 the model above. The post-I population ( $i = 4$ ) differed from the previous model. It possessed the  
 685 outward adaptive potassium current ( $I_{AD}$ ) as well as input from the Nucleus of the Solitary Tract  
 686 (NTS).

687 We defined the dynamic input to the respiratory CPG from the NTS as  $I_{NTS,i}$ . The only  
 688 population receiving this input was the post-I populations ( $i = 4$ ). This input was composed of  
 689 synaptic currents related to the Hering-Breuer reflex,  $I_{HB}$ , and the carotid baroreflex,  $I_{CB}$ , such  
 690 that  $I_{NTS} = I_{HB} + I_{CB}$ . The Hering-Breuer reflex was defined as  $I_{HB} = \alpha_{HB} L$  where  $\alpha_{HB}$  was a  
 691 gain parameter and  $L$  was the tidal volume ( $L$  is defined below). The carotid baroreflex was  
 692 defined as

693

$$I_{CB} = \begin{cases} \alpha_{CB}(p - p_s), & \text{if } p > p_s \text{ and } V_5 < -45 \text{ mV} \\ 0, & \text{otherwise} \end{cases}$$

694  
 695 Where  $\alpha_{CB}$  was a gain parameter,  $p$  is the blood pressure (defined below),  $p_s$  is the smoothed  
 696 blood pressure (defined below), and  $V_5$  is the average membrane potential of the ramp-I  
 697 population.

698 The tidal volume of the lungs is defined by

$$\tau_L \frac{dL}{dt} = f(V_5) - L$$

699 such that  $f(V_5)$  is the firing rate of the ramp-I neuronal population.

700 The blood pressure is defined by the differential equation

$$\tau_p \frac{dp}{dt} = -(p - p_0).$$

701 The steady state blood pressure was  $p_0 = (p_1 - p_2 \exp(-1/(\Omega\tau_p))) / (1 - \exp(-1/(\Omega\tau_p)))$ ,  
 702 where  $p_1$  and  $p_2$  are nominal systolic and diastolic pressures,  $\Omega$  is nominal heart rate, and  $\tau_p$  is  
 703 blood pressure relaxation constant. We also utilize a smoothed blood pressure approximately  
 704 representing average blood pressure over time  $\tau_s$ . It was defined by the differential equation

$$\tau_s \frac{dp_s}{dt} = (p - p_s).$$

705 The activation of the adaptive potassium current ( $I_{AD}$ ) was altered in this model to account for  
 706 variability in the duration of inspiration and expiration. The activation variable was defined as a  
 707 stochastic differential equation:

708

$$dm_i = \frac{K_i f(V_i) - m_i}{\tau_{m,i}} dt + \sigma dW_i$$

709 where  $W_i$  is Wiener stochastic process, and the magnitude of  $\sigma$  defined respiratory variability.

710 The beating of the heart was described by non-homogenous Poisson process with the rate

711

$$\lambda(t) = \Omega + RSA \times L$$

712 Where  $L$  is the tidal volume, and  $RSA$  is a parameter that defines the amplitude of respiratory  
 713 sinus arrhythmia. To approximate the heart rate variability observed in human data, the cardiac

714 cycle was divided into 200 states, and the transition time between states was generated as an  
 715 exponentially distributed random number with rate  $\lambda(t) \times 200$ .

716 Biophysical parameters and synaptic weights specific to the model of human  
 717 cardiorespiratory interaction can be found in Tables 3 and 4. This model was used for simulations  
 718 of regular restful breathing as well as slow deep breathing. In order to increase the duration of  
 719 inspiration and expiration to mimic slow deep breathing in humans, we decreased the tonic  
 720 excitatory drive to the early-I ( $i = 2$ ) and post-I ( $i = 4$ ) neuronal populations as well as the  
 721 amplitude of the Weiner process (values given in Tables 3 and 4). Simulations were performed  
 722 using custom software written in C++. Differential equations were solved using the stochastic  
 723 Euler-Maruyama method with a step of 0.1 ms.

724  
 725  
 726

727 **Table 3.** Summary of biophysical parameters for the model of human cardiorespiratory  
 728 interaction. Quantities marked with an asterisk emphasize values that differ from the model of  
 729 rodent baroreflex stimulation. Quantities contained within parentheses indicate the parameter  
 730 value used for simulations of slow deep breathing.

|                       |                        |                           |                     |
|-----------------------|------------------------|---------------------------|---------------------|
| $\tau_{AD}$<br>= 4 s* | $\tau_{NaP}$<br>= 8 s* | $\alpha_{CB}$<br>= 0.0005 | $\alpha_{HB} = 0.1$ |
| $\tau_L = 1 s$        | $\tau_P = 1 s$         | $\tau_s = 10 s$           | $p_1$<br>= 120 mmHg |
| $p_1$<br>= 80 mmHg    | $\Omega$<br>= 1 Hz     | $RSA$<br>= 0.0005         | $\sigma$            |

731  
 732

733 **Table 4.** Summary of synaptic connectivity among neuronal populations for the model of human  
 734 cardiorespiratory interaction. Quantities contained within parentheses indicate the parameter  
 735 value used for simulations of slow deep breathing.

|  |         |         |       |        |        |       |
|--|---------|---------|-------|--------|--------|-------|
|  | Pre-I/I | Early-I | Aug-E | Post-I | Ramp-I | Drive |
|--|---------|---------|-------|--------|--------|-------|

| Synaptic Weights | $a_{1i}$ | $b_{2i}$ | $b_{3i}$ | $b_{4i}$ | $a_{5i}$ | $c_i$       |
|------------------|----------|----------|----------|----------|----------|-------------|
| Pre-I/I          |          |          |          | 0.1      |          | 0.1         |
| Early-I          | 0.5      |          | 0.05     | 0.42     |          | 0.65 (0.15) |
| Aug-E            |          | 0.42     |          | 0.2      |          | 0.4         |
| Post-I           |          | 0.22     |          |          |          | 0.55 (0.2)  |
| Ramp-I           | 0.5      | 0.3      | 0.7      | 0.7      |          | 0.8         |

736

737

738

739

740

## 741 **Acknowledgments**

742

743 The study was supported by NIH grants R01 AT008632 (Y.M.), U01 EB021960 (T.D. and Y.M.).

744 The human data was collected by E.W. in collaboration with Michael Joyner under support of the

745 NIH grant HL 083947. JFRP is supported by the Marsden Fund Council from Government

746 funding, managed by Royal Society Te Apārangi, and Health Research Council of New Zealand.

747

## 748 **Figure Captions**

749

750 **Figure 1. Temporal raster plot of the heartbeats relative to the inspiratory onset.** Every blue  
751 dot represents a single heartbeat (representative data shown from one supine, male subject). The  
752 coordinates of the dot are the occurrence times in seconds of a heartbeat relative to the start of the  
753 recording ( $x$ -coordinate) and of the interval between the heartbeat time to the onset of inspiration  
754 of the closest breath ( $y$ -coordinate). Negative  $y$ -values correspond to heartbeats occurring at the  
755 end of expiration before the inspiratory onset, and positive  $y$ -values correspond to the heartbeats  
756 occurring after the inspiratory onset (shown by horizontal black dashed line). Vertical dashed  
757 lines show the beginning (green) and the end (red) of recording segments selected from the  
758 baseline, SDB and recovery parts of the experiment. We did not analyze the transition periods  
759 between baseline and SDB and between SDB and recovery.

760

761 **Figure 2. Distribution of heartbeats preceding the inspiratory onset.** Each panel shows the  
762 cumulative distribution function (CDF, blue lines) as well as the histograms (probability density  
763 function, PDF, green bars) of the heartbeat occurrence times relative to the onset of the next  
764 inspiration (heartbeat latency) for the recording segments corresponding to baseline breathing,  
765 slow deep breathing (SDB) and recovery in supine male subjects. The three rows show data for  
766 three different individuals. Orange lines are the CDFs of the uniform probability distribution. Red

767 bars indicate maximal distance between the actual CDF and the uniform CDF. The distributions  
768 for all 10 subjects were statistically significantly different from uniform distributions.

769

770 **Figure 3. The measure of CVC strength and last heartbeat latency before inspiration.** We  
771 used the maximal difference between the heartbeat latency cumulative distribution function  
772 (CDF) and the uniform distribution (see red bars in Fig. 2) as a measure of CVC strength in a  
773 particular individual. **A.** Group data for CVC strength which appeared to be consistent among  
774 individuals and did not vary significantly across the three experimental conditions. **B.** The  
775 characteristic heartbeat latency from inspiration (calculated as  $x$ -coordinates of the red bars in Fig.  
776 2) also had similar values (approximately 200ms) across individuals and did not change  
777 significantly from baseline to SDB to recovery.

778

779 **Figure 4. Experimental setup of artificially perfused brainstem-spinal cord preparation in a**  
780 **rodent.** **A.** The preparation is referred to as *in situ* because the brainstem, spinal cord and  
781 connectivity to peripheral mechano-, baro- and chemo- sensory and to homeostatic motor fibers  
782 remain intact. Thus, reflex evoked responses can be recorded. **B.** Traces of the physiologic  
783 recordings. A pulse in the perfusion pressure (PP) can be delivered in different phases of the  
784 respiratory cycle defined by phrenic nerve activity (PNA, blue trace). Bursts in PNA correspond  
785 to the inspiratory phase and interburst intervals are expiratory phases. As shown in this example,  
786 when the pressure pulse occurs during expiration it noticeably delays the onset of the next  
787 inspiratory burst in PNA (i.e. prolongs expiration). It also causes a dip in thoracic sympathetic  
788 nerve activity (tSNA, red trace). Neural activity is recorded extracellularly by 16-channel  
789 multielectrode array. Examples of neuronal activity traces are shown in violet and pink. First  
790 three neurons exhibit post-inspiratory discharge pattern (pI) with stronger firing during the  
791 pressure pulse. In contrast, the fourth neuron (aug-E) that fires at the end of expiration, reduces its  
792 activity during perfusion pressure excursion.

793

794 **Figure 5. The effects of pressure pulses delivered in different phases of the respiratory cycle**  
795 **on the respiratory cycle duration.** We determined the phase of pressure pulse from its peak. In  
796 the *in situ* preparation, if the pressure pulse occurred in inspiration (I, n=9), then it had no  
797 significant effect on cycle duration. But when delivered during first half (post-I, n=11) or the



798 second half of expiration (E2, n=9), it prolonged the expiratory phase and thus increased cycle  
799 duration. Error bars represent the mean  $\pm$  SD.

800

801 **Figure 6. Effects of pressure pulses on firing of expiratory-modulated brainstem neurons.**

802 **A&B.** Tracings from top: representative post-I neuron (**A**) and aug-E neuron (**B**), perfusion  
803 pressure (red) and integrated PNA (black). Gray thick curve in the top panel represents the cycle-  
804 triggered average of the firing rate of these neurons in unperturbed cycles. The pressure pulse was  
805 delivered at the time when the post-I neuron (**A**) would cease firing and when the aug-E neuron  
806 (**B**) would be augmenting. During baroreceptor stimulation induced by the transient pulse  
807 pressure, the firing rate of the post-I increased (**A**) whereas the aug-E neuron decreased then  
808 recovered the perfusion pressure decreased (**B**). **C.** Group data summarizing the effect of pressure  
809 pulses on the activity of neurons of different firing phenotypes (I (n=8), post-I (n=5), and aug-E  
810 (n=14)). When the pulse was delivered during inspiration, it had no significant effect on the  
811 average firing rate of the recorded inspiratory neurons. When the pulse was delivered during  
812 expiration, we registered significant increases in post-I neurons activity and decreases in aug-E  
813 activity.

814

815 **Figure 7. Model schematic for cardio-respiratory interactions.** The respiratory central pattern  
816 generator (CPG) is represented by interconnected populations of neurons in Bötzing (BötC) and  
817 pre-Bötzing (pre-BotC) complexes that contribute to the activity of the phrenic premotor  
818 population (ramp-I) in the rostral ventral respiratory group (rVRG). These neurons define the  
819 activity of the diaphragm and lung inflation. In the absence of ramp-I activity, the lungs passively  
820 deflate. The lung volume is decoded by pulmonary stretch receptors that send synaptic inputs to  
821 the pump cells located within the nucleus tractus solitarius (nTS) through the vagus nerve. Pump  
822 cells excite BötC post-I neurons which creates a negative feedback loop for off-switching  
823 inspiratory activity (Hering-Breuer reflex). Nucleus Ambiguus contains a population of cardiac  
824 neurons that modulate heart rate by inhibitory inputs to the sinoatrial node. The cardiac neurons  
825 receive inputs from respiratory populations and/or pump cells so that their output becomes  
826 respiratory modulated and thus serves as a mechanism for respiratory sinus arrhythmia and blood  
827 pressure oscillations (Traube-Hering waves) in the model. Arterial baroreceptors encode the  
828 blood pressure value and send this information to the nTS second-order neurons in the baroreflex

829 arc. The latter project to the post-I neurons in the BötC thus creating a beat-by-beat arterial  
830 pressure input to the respiratory CPG underlying cardio-ventilatory coupling. Through these  
831 mechanisms the heartbeat can affect the timing of the next breath.

832  
833 **Figure 8. Modeling the effect of transient baroreceptor stimulation.** Traces from the top:  
834 activity of four neuronal populations representing the respiratory CPG: pre-I/I, early-I, aug-E and  
835 post-I (see Fig. 7). Black traces represent unperturbed activity. After inspiration ends, the post-I  
836 population activates strongly and then adapts, gradually releasing the aug-E population from  
837 inhibition. This post-I adaptation eventually allows the inspiratory populations (early-I and pre-  
838 I/I) to activate. Dashed traces show the CPG activity in the presence of a baroreceptor stimulus  
839 (bottom trace). When it arrives centrally, the post-I population reactivates again, inhibits the aug-  
840 E population and prevents inspiration from starting until the baroreceptor activity wanes.

841  
842 **Figure 9. Representative data from a subject (A&C) compared to model simulations (B&D).**  
843 **A&C.** Traces (30 sec) of tidal volume, time stamp for ECG R-peaks and brachial intra-arterial  
844 pressure during baseline (A) and slow deep breathing (SDB, C). **B&D.** Dynamics of the  
845 corresponding variables in the model mimicking baseline (B) and SDB (D) conditions (see text).  
846 We tuned the model in such a way that respiratory phase durations, HR, systolic and diastolic  
847 pressures as well as variabilities of all these metrics in both baseline and SDB conditions matched  
848 our experimental group data we previously published (Barnett *et al.*, 2020); see Fig. 9. We varied  
849 the CVC gain in the model to determine the range in which the model demonstrated heartbeat  
850 distributions similar to the experimentally observed ones (Fig. 2).

851  
852 **Figure 10. The model qualitatively reproduces the heartbeat latency distributions as long as**  
853 **baroreceptor-to-respiratory network pathway is functional.** Each panel shows the cumulative  
854 distribution function (CDF) of heartbeat latency before inspiration (blue lines) and corresponding  
855 probability density function (PDF) histograms (green bars) in the 0.5s time interval preceding the  
856 inspiratory onset. Orange lines depict CDFs of uniform distributions. Red bars indicate maximal  
857 differences between the heartbeat latency CDFs from the model and uniform distributions. For the  
858 first row of the plots, the model included interactions between respiratory and cardiac systems in  
859 both directions, i.e. RSA and CVC. Both conditions, baseline and SDB in human subjects, feature

860 a 200-300ms gap in heartbeat latency distributions. In the second row, we disrupted the CVC by  
861 setting the NTS-to-post-I synaptic weight to 0 (see Fig. 7), which made the heartbeat latency  
862 distribution statistically indistinguishable from the uniform distribution (orange lines). The third  
863 row was constructed by removing the respiratory modulation of NA cardiac neurons (underlying  
864 RSA, see Fig. 7) from the model while retaining CVC, which did not have a significant effect on  
865 the distributions (compare with the first and the third rows).

866

867

868

## 869 **References**

870

871 Ausborn J, Koizumi H, Barnett WH, John TT, Zhang R, Molkov YI, Smith JC & Rybak IA.  
872 (2018). Organization of the core respiratory network: Insights from optogenetic and  
873 modeling studies. *PLoS Comput Biol* **14**, e1006148.

874

875 Baekey DM, Dick TE & Paton JF. (2008). Pontomedullary transection attenuates central  
876 respiratory modulation of sympathetic discharge, heart rate and the baroreceptor reflex  
877 in the in situ rat preparation. *Experimental physiology* **93**, 803-816.

878

879 Baekey DM, Molkov YI, Paton JF, Rybak IA & Dick TE. (2010). Effect of baroreceptor  
880 stimulation on the respiratory pattern: insights into respiratory-sympathetic  
881 interactions. *Respir Physiol Neurobiol* **174**, 135-145.

882

883 Barnett WH, Latash EM, Capps RA, Dick TE, Wehrwein EA & Molkov YI. (2020). Traube-  
884 Hering waves are formed by interaction of respiratory sinus arrhythmia and pulse  
885 pressure modulation in healthy men. *J Appl Physiol (1985)* **129**, 1193-1202.

886

887 Ben-Tal A. (2012). Computational models for the study of heart-lung interactions in  
888 mammals. *Wiley Interdiscip Rev Syst Biol Med* **4**, 163-170.

889  
890 Ben-Tal A, Shamailov SS & Paton JF. (2012). Evaluating the physiological significance of  
891 respiratory sinus arrhythmia: looking beyond ventilation-perfusion efficiency. *The*  
892 *Journal of physiology* **590**, 1989-2008.

893  
894 Billman GE. (2011). Heart rate variability - a historical perspective. *Front Physiol* **2**, 86.

895  
896 Bishop B. (1974). Carotid baroreceptor modulation of diaphragm and abdominal muscle  
897 activity in the cat. *J Appl Physiol* **36**, 12-19.

898  
899 Bucher K. (1963). Das herz als Schrittmacher für die atmung. *Z naturwiss-med*  
900 *Grundlagenforsch* **1**, 318-331.

901  
902 Convertino VA. (2019). Mechanisms of inspiration that modulate cardiovascular control: the  
903 other side of breathing. *J Appl Physiol (1985)* **127**, 1187-1196.

904  
905 Dick TE, Hsieh YH, Dhingra RR, Baekey DM, Galan RF, Wehrwein E & Morris KF.  
906 (2014a). Cardiorespiratory coupling: common rhythms in cardiac, sympathetic, and  
907 respiratory activities. *Progress in brain research* **209**, 191-205.

908  
909 Dick TE, Mims JR, Hsieh YH, Morris KF & Wehrwein EA. (2014b). Increased cardio-  
910 respiratory coupling evoked by slow deep breathing can persist in normal humans.  
911 *Respir Physiol Neurobiol* **204**, 99-111.

912  
913 Dick TE & Morris KF. (2004). Quantitative analysis of cardiovascular modulation in  
914 respiratory neural activity. *The Journal of physiology* **556**, 959-970.

915

- 916 Dick TE, Shannon R, Lindsey BG, Nuding SC, Segers LS, Baekey DM & Morris KF. (2005).  
917 Arterial pulse modulated activity is expressed in respiratory neural output. *J Appl*  
918 *Physiol (1985)* **99**, 691-698.
- 919
- 920 Friedman L, Dick TE, Jacono FJ, Loparo KA, Yeganeh A, Fishman M, Wilson CG & Strohl  
921 KP. (2012). Cardio-ventilatory coupling in young healthy resting subjects. *J Appl*  
922 *Physiol (1985)* **112**, 1248-1257.
- 923
- 924 Galletly D & Larsen P. (1999). Ventilatory frequency variability in spontaneously breathing  
925 anaesthetized subjects. *Br J Anaesth* **83**, 552-563.
- 926
- 927 Galletly DC & Larsen PD. (1997). Cardioventilatory coupling during anaesthesia. *Br J*  
928 *Anaesth* **79**, 35-40.
- 929
- 930 Galletly DC & Larsen PD. (1998). Relationship between cardioventilatory coupling and  
931 respiratory sinus arrhythmia. *Br J Anaesth* **80**, 164-168.
- 932
- 933 Grunstein MM, Derenne JP & Milic-Emili J. (1975). Control of depth and frequency of  
934 breathing during baroreceptor stimulation in cats. *J Appl Physiol* **39**, 395-404.
- 935
- 936 Koehle MS, Giles LV, Walsh ML & White MD. (2010). The effects of lower body positive  
937 and negative pressure on the hypoxic ventilatory decline. *Respir Physiol Neurobiol*  
938 **172**, 37-41.
- 939
- 940 Koizumi H & Smith JC. (2008). Persistent Na<sup>+</sup> and K<sup>+</sup>-dominated leak currents contribute to  
941 respiratory rhythm generation in the pre-Botzinger complex in vitro. *J Neurosci* **28**,  
942 1773-1785.
- 943

- 944 Kumar P & Prabhakar NR. (2012). Peripheral chemoreceptors: function and plasticity of the  
945 carotid body. *Compr Physiol* **2**, 141-219.
- 946
- 947 Lindsey BG, Arata A, Morris KF, Hernandez YM & Shannon R. (1998). Medullary raphe  
948 neurones and baroreceptor modulation of the respiratory motor pattern in the cat. *The*  
949 *Journal of physiology* **512** ( Pt 3), 863-882.
- 950
- 951 Molkov YI, Bacak BJ, Dick TE & Rybak IA. (2013). Control of breathing by interacting  
952 pontine and pulmonary feedback loops. *Front Neural Circuits* **7**, 16.
- 953
- 954 Molkov YI, Shevtsova NA, Park C, Ben-Tal A, Smith JC, Rubin JE & Rybak IA. (2014). A  
955 closed-loop model of the respiratory system: focus on hypercapnia and active  
956 expiration. *PloS one* **9**, e109894.
- 957
- 958 Richter DW & Sellar H. (1975). Baroreceptor effects on medullary respiratory neurones of the  
959 cat. *Brain Res* **86**, 168-171.
- 960
- 961 Rubin JE, Bacak BJ, Molkov YI, Shevtsova NA, Smith JC & Rybak IA. (2011). Interacting  
962 oscillations in neural control of breathing: modeling and qualitative analysis. *J Comput*  
963 *Neurosci* **30**, 607-632.
- 964
- 965 Rubin JE, Shevtsova NA, Ermentrout GB, Smith JC & Rybak IA. (2009). Multiple rhythmic  
966 states in a model of the respiratory central pattern generator. *J Neurophysiol* **101**,  
967 2146-2165.
- 968
- 969 Skytjoti M, Søvik S & Elstad M. (2018). Respiratory pump maintains cardiac stroke volume  
970 during hypovolemia in young, healthy volunteers. *J Appl Physiol (1985)* **124**, 1319-  
971 1325.
- 972

- 973 Smith JC, Abdala AP, Koizumi H, Rybak IA & Paton JF. (2007). Spatial and functional  
974 architecture of the mammalian brain stem respiratory network: a hierarchy of three  
975 oscillatory mechanisms. *J Neurophysiol* **98**, 3370-3387.
- 976
- 977 Smith JC, Ellenberger HH, Ballanyi K, Richter DW & Feldman JL. (1991). Pre-Botzinger  
978 complex: a brainstem region that may generate respiratory rhythm in mammals.  
979 *Science* **254**, 726-729.
- 980
- 981 Stewart JM, Rivera E, Clarke DA, Baugham IL, Ocon AJ, Taneja I, Terilli C & Medow MS.  
982 (2011). Ventilatory baroreflex sensitivity in humans is not modulated by chemoreflex  
983 activation. *Am J Physiol Heart Circ Physiol* **300**, H1492-1500.
- 984
- 985 Tzeng YC, Larsen PD & Galletly DC. (2003). Cardioventilatory coupling in resting human  
986 subjects. *Experimental physiology* **88**, 775-782.
- 987
- 988 Tzeng YC, Larsen PD & Galletly DC. (2007). Mechanism of cardioventilatory coupling:  
989 insights from cardiac pacing, vagotomy, and sinoaortic denervation in the anesthetized  
990 rat. *Am J Physiol Heart Circ Physiol* **292**, H1967-1977.
- 991
- 992



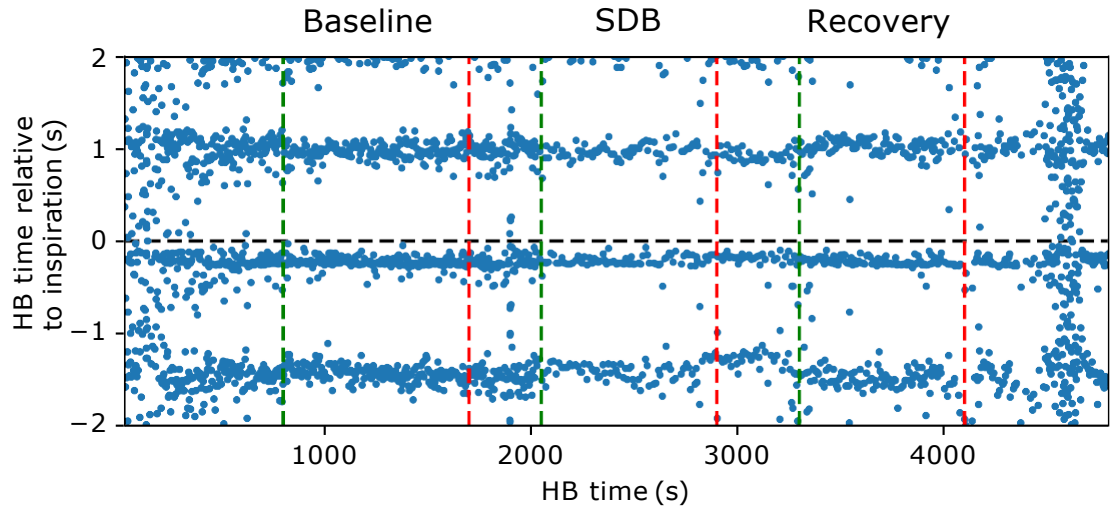

baseline

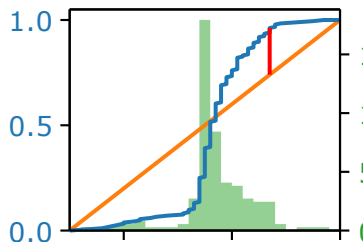

SDB

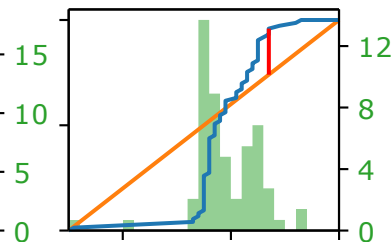

recovery

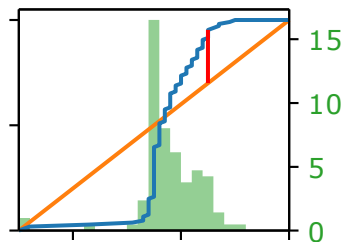

# 8

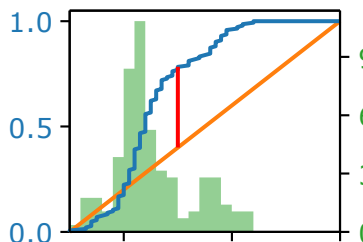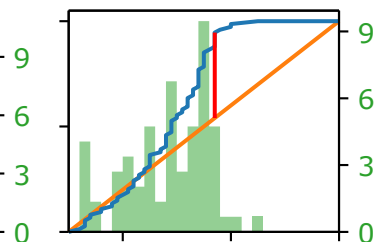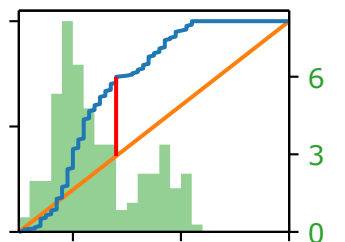

# 10

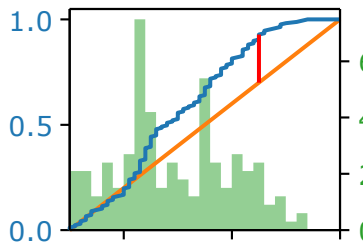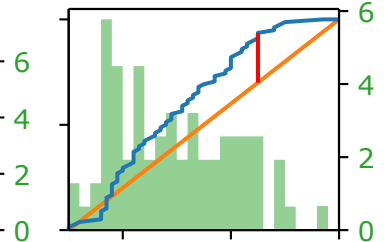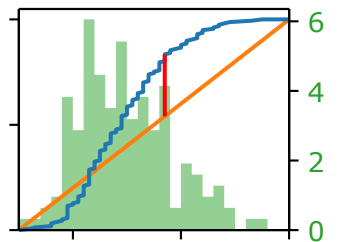

time (s)

time (s)

time (s)

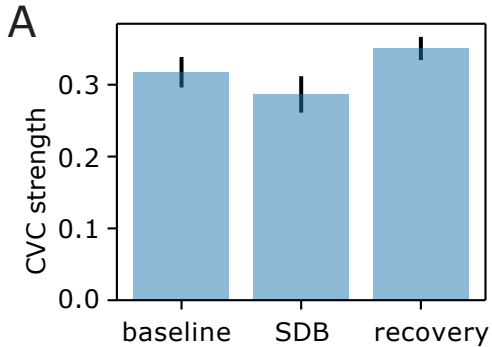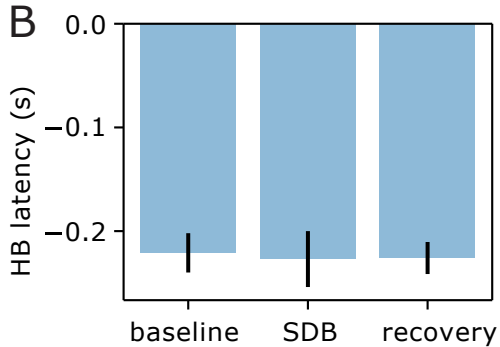

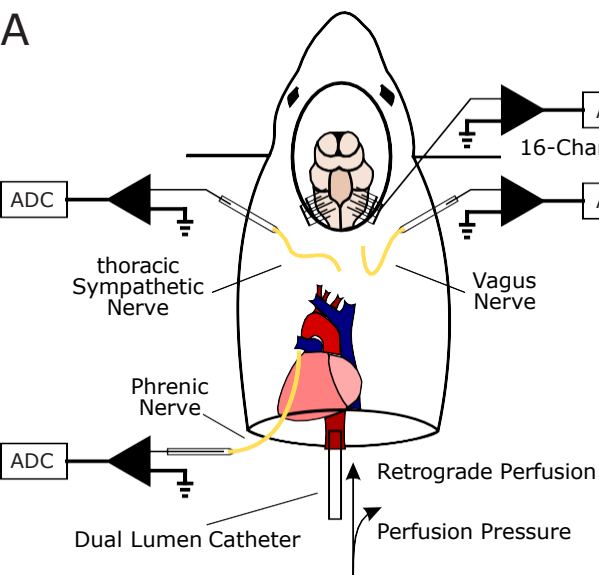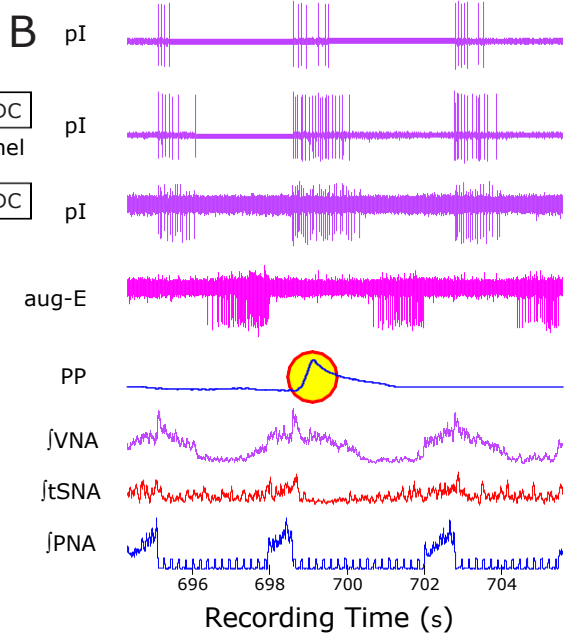

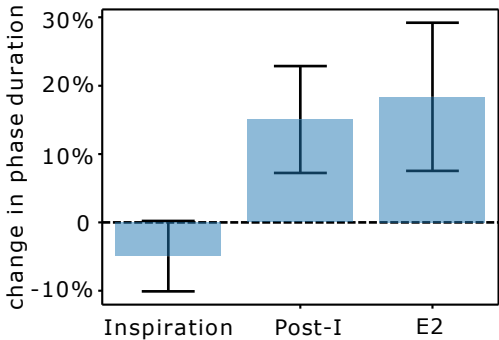

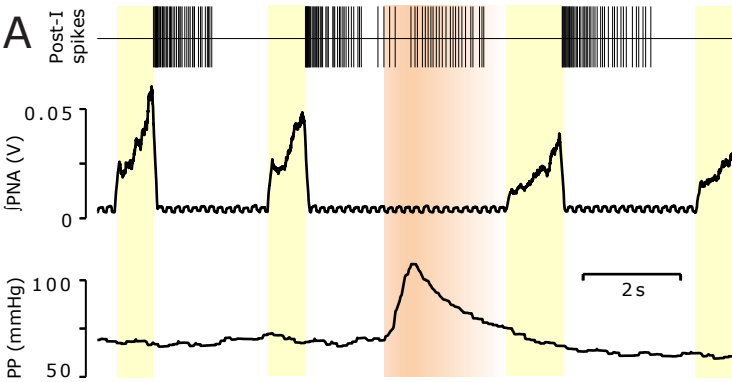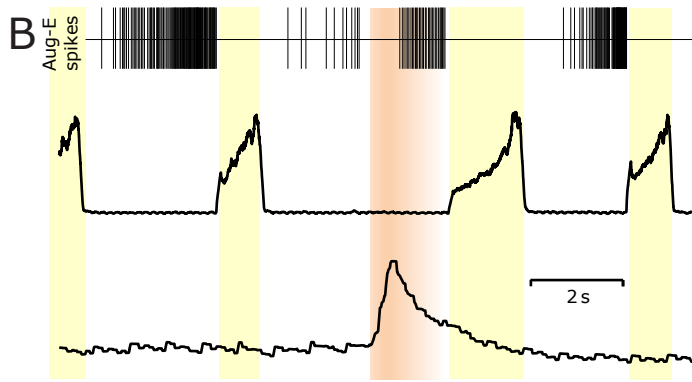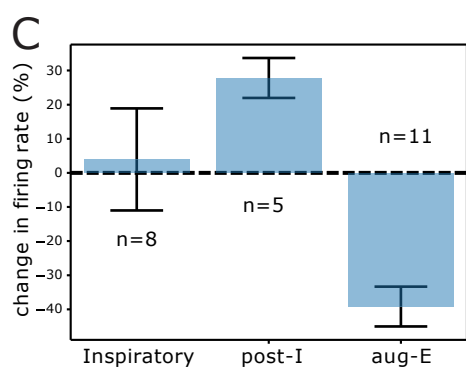

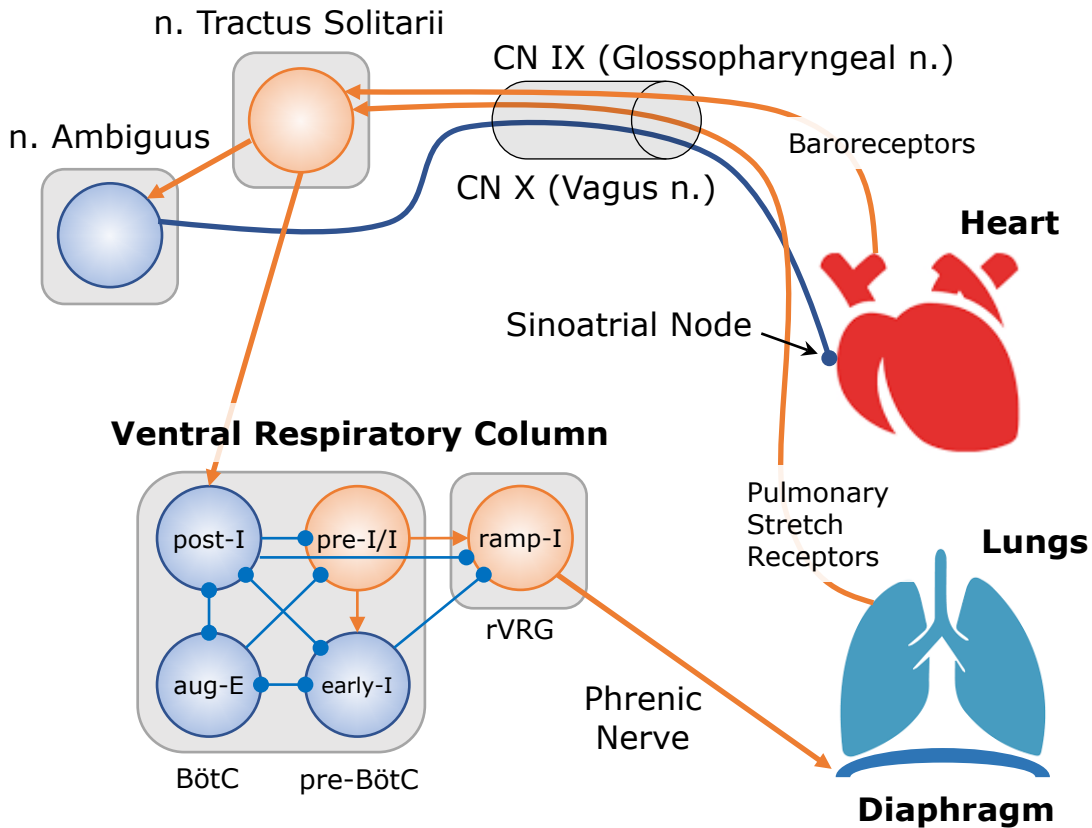

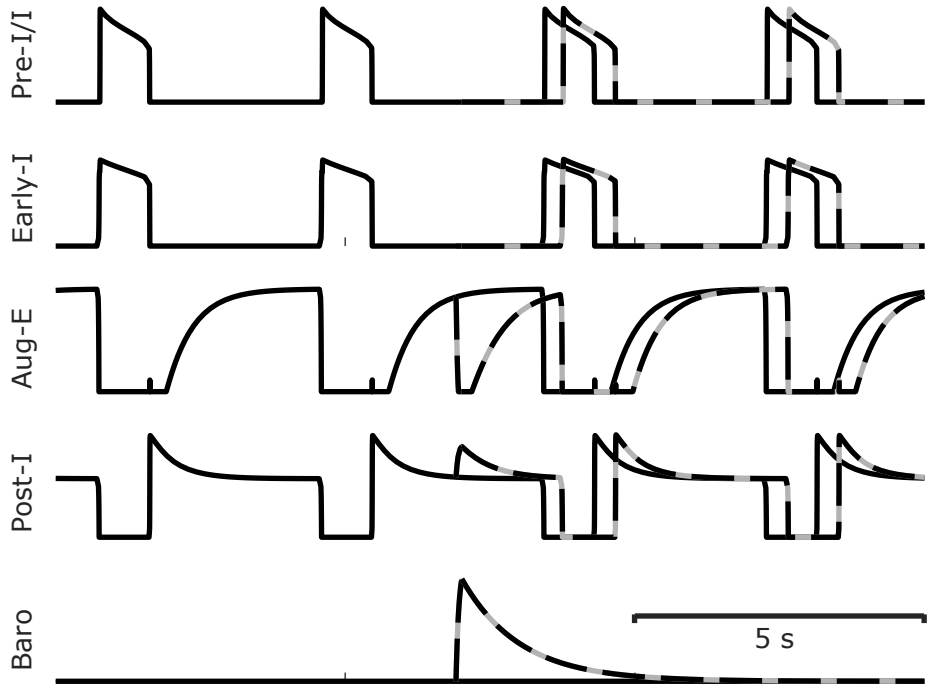



A

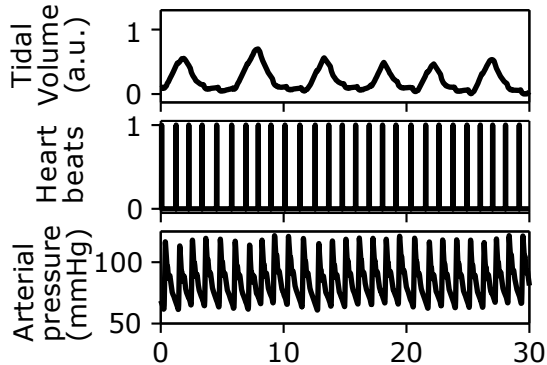

B

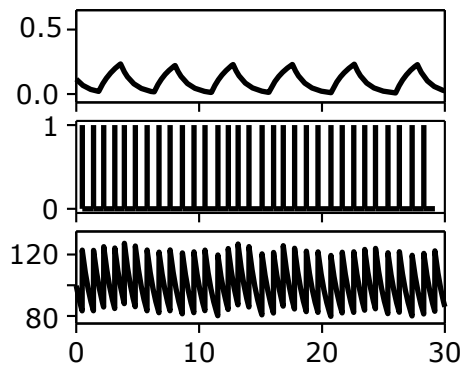

C

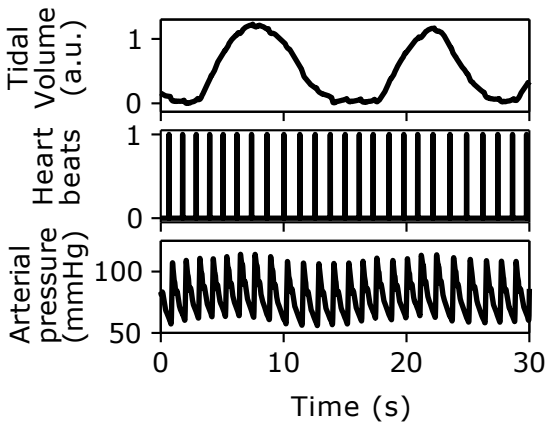

D

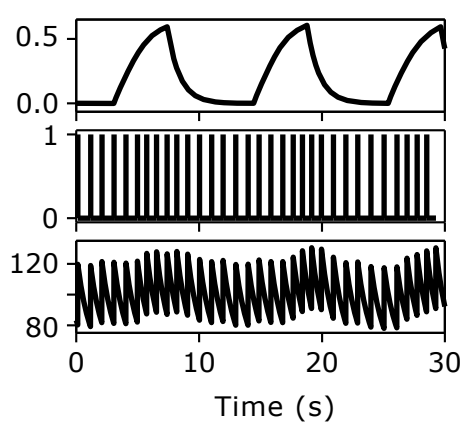

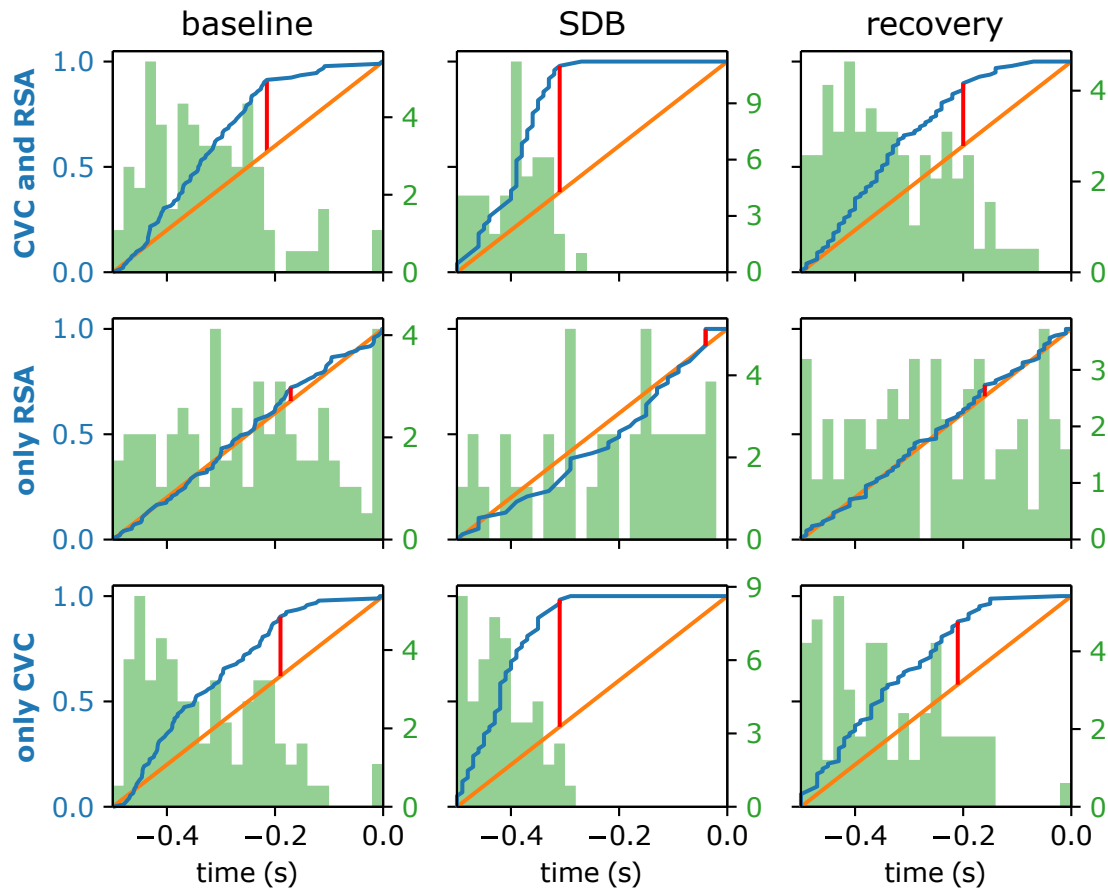

Source: https://www.biorxiv.org/content/10.1101/2020.12.09.416776v1.full.pdf
